# Supplementary material for: A Review of the Potential Benefits of Plants Producing Berries in Skin Disorders
Source: Antioxidants (Basel). 2020 Jun 20;9(6):542. doi: 10.3390/antiox9060542 (PMC7346205; doi:10.3390/antiox9060542)
Supplement: Supplementary file 1 [file antioxidants-09-00542-s001.pdf]

**Table S1.** List of acronyms

| Acronym      | Definition                                                                          | Acronym        | Definition                                                    |
|--------------|-------------------------------------------------------------------------------------|----------------|---------------------------------------------------------------|
| 4-HNE        | 4-hydroxy-2-nonenal                                                                 | MAPK           | mitogen-activated protein kinase                              |
| 8-oxodG      | 8-Oxo-2'-deoxyguanosine                                                             | MCP-1          | monocyte chemoattractant protein 1                            |
| Akt          | protein kinase B                                                                    | MDA            | malondialdehyde                                               |
| AMPK         | 5' AMP-activated protein kinase                                                     | MKK            | mitogen-activated protein kinase kinase                       |
| AP-1         | activator protein 1                                                                 | MMP            | metalloproteinases                                            |
| BaPDE        | benzoapyrene-diol-epoxide                                                           | MnSOD          | manganese- dependent superoxide dismutase                     |
| CAT          | catalase                                                                            | MPO            | myeloperoxidase                                               |
| CD3          | cluster of differentiation 3                                                        | mTOR           | mammalian target of rapamycin                                 |
| CD8          | cluster of differentiation 8                                                        | MTT            | (3-(4,5-dimethylthiazol-2-yl)-2,5-diphenyltetrazolium bromide |
| CoQ10        | Coenzyme Q10                                                                        | NF- $\kappa$ B | nuclear factor kappa B                                        |
| CoQox        | Coenzyme Q10 oxidized                                                               | NFAT           | nuclear factor of activated T-cells                           |
| CoQred       | Coenzyme Q10 reduced                                                                | NHEK           | normal human epidermal keratinocytes                          |
| COX-2        | cyclooxygenase 2                                                                    | NLRP3          | NLR Family Pyrin Domain Containing 3                          |
| CPD          | cyclobutane pyrimidine dimers                                                       | Nrf-2          | nuclear factor erythroid 2-related factor 2                   |
| DNCB         | 2,4-dinitrochlorobenzene                                                            | OCR            | oxygen consumption rate                                       |
| DNFB         | 1-fluoro-2,4-dinitrobenzene                                                         | p38            | P38 mitogen-activated protein kinases                         |
| ERK          | extracellular-signal-regulated kinase                                               | PCNA           | proliferating cell nuclear antigen                            |
| foxp3        | forkhead box P3                                                                     | PGE2           | Prostaglandin E2                                              |
| Gpx          | glutathione peroxidase                                                              | PI3K           | phosphoinositide 3-kinases                                    |
| GSH          | glutathione                                                                         | PMA            | phorbol 12-myristate 13-acetate                               |
| Gsta1        | glutathione S-transferase 1                                                         | PMN            | polymorphonuclear cells                                       |
| H2AX         | H2A histone family member X                                                         | PUFA           | polyunsaturated fatty acids                                   |
| HDF          | human dermal fibroblasts                                                            | ROS            | reactive oxygen species                                       |
| HO-1         | heme oxygenase 1                                                                    | SOD            | superoxide dismutase                                          |
| IgE          | immunoglobulin E                                                                    | SPF10          | sun protective formulation-10                                 |
| IKB $\alpha$ | nuclear factor of kappa light polypeptide gene enhancer in B-cells inhibitor, alpha | STAT3          | signal transducer and activator of transcription 3            |
| IL           | interleukin                                                                         | TIMP           | tissue inhibitor of metalloproteinases                        |
| iNOS         | inducible nitric oxide synthase                                                     | TLR            | Toll-like Receptor                                            |
| JB6 Cl 41    | epidermal mouse cells                                                               | TNCB           | 2,4,6-trinitro-1-chlorobenzene                                |
| JNK          | c-Jun N-terminal kinase                                                             | TNF- $\alpha$  | tumor necrosis factor- $\alpha$                               |
| LPS          | lipopolysaccharide                                                                  | UV             | ultraviolet rays                                              |
| LXR          | liver X receptor                                                                    | VEGF           | vascular endothelial growth factor                            |

**Table S2.** Wound healing effects of plants producing berries

| Plant material/extraction                                                                         | Evidence | Model/Assay                                   | Dose and administration           | Reference compound                       | Results (↑ increase; ↓ reduction)                                                                                                                     | Ref.  |
|---------------------------------------------------------------------------------------------------|----------|-----------------------------------------------|-----------------------------------|------------------------------------------|-------------------------------------------------------------------------------------------------------------------------------------------------------|-------|
| Euterpe oleracea Mart.                                                                            |          |                                               |                                   |                                          |                                                                                                                                                       |       |
| Water extracts from whole fruit powder (warm extraction, 80°C)                                    | In vitro | HS68 fibroblast cells                         | 0.1-1 mg/mL                       |                                          | ↑ migration and proliferation; ↑ fibronectin<br>↓ MMP-1                                                                                               | [23]  |
|                                                                                                   |          | Enzymatic test                                | 1-10 mg/mL                        | Ascorbic acid (1-10 mg/mL)               | ↓ elastase and collagenase                                                                                                                            |       |
|                                                                                                   | In vivo  | Sprague Dawley rats, round excision           | 1-5% solution; topical appl       | Ointment 20 mg/g (2%) of sodium fusidate | ↓ wound area; ↓ mast cell infiltration<br>↑ collagen                                                                                                  |       |
|                                                                                                   |          |                                               |                                   | //                                       | ↑ collagen, VEGF, fibronectin<br>↓ MMP- 1, IL-1β                                                                                                      |       |
| Punica granatum L.                                                                                |          |                                               |                                   |                                          |                                                                                                                                                       |       |
| Seed oil, fermented juice and water extract from fruit peel (warm extraction)                     | In vitro | Primary keratinocytes and fibroblasts         | 0,01-1 µl/mL                      | //                                       | Seed oil: ↑ keratinocyte proliferation<br>Peel extract: ↑ fibroblasts proliferation, procollagen, MMP1                                                | [58]  |
| Powder from dry pomegranate rind                                                                  | In vivo  | Wistar albino rats, round excision            | 10% ointment                      | Fucidin ointment (fusidic acid)          | ↓ wound area vs positive control                                                                                                                      | [121] |
| Ethanol:water (3:1) extract from peel and pulp of rind                                            | In vivo  | Wistar rats, linear incision                  | Dose omitted, topical appl        | Phenytoin                                | ↓ wound area by peel extract, comparable to positive control<br>↑ epithelization, neo-vascularization, fibroblast count<br>↓ PMN and macrophage count | [122] |
| Commercial extract from peel                                                                      | In vivo  | Wistar rats, round excision                   | 15% ointment, 10 mg/Kg, topically | Gentamycin 10 mg/Kg                      | ↓ wound area                                                                                                                                          | [112] |
| Methanol:water (3:1) extract from dried peel. Qualitative characterization of punicalagin A and B | In vivo  | Guinea pigs, round excision                   | 5% w/w ointment                   | 2% cetrimide                             | ↓ wound area ↑ total proteins, DNA, hydroxyproline<br>↑ collagen orientation and fibroblast proliferation<br>↓ macrophage infiltration                | [55]  |
| Extract from whole fruit (solvent omitted) titred for ellagic acid (40%)                          | In vivo  | Albino rats, II-degree burn model (hot plate) | 2.5-10% ointment                  | Silver sulphadiazine 1%                  | ↓ wound area ↑ collagen deposition<br>↓ angiogenesis, PMN cells count                                                                                 | [52]  |
|                                                                                                   | In vivo  | Wistar rats, linear incision                  |                                   |                                          | ↑ tensile strength vs positive control;<br>Corresponding dose of EA (0.65%) showed comparable effect                                                  | [54]  |

|                                                                                                                                                                                                                            |                |                                                            |                                        |                                                            |                                                                                                                                                                                                                                                                       |       |
|----------------------------------------------------------------------------------------------------------------------------------------------------------------------------------------------------------------------------|----------------|------------------------------------------------------------|----------------------------------------|------------------------------------------------------------|-----------------------------------------------------------------------------------------------------------------------------------------------------------------------------------------------------------------------------------------------------------------------|-------|
| Methanol:water (9:1) extract from peel dried. Ethyl acetate fraction titred for ellagic acid (13%).                                                                                                                        | <i>In vivo</i> | Wistar rats, round excision                                | 2.5-10% ointment; corresponding 0,13%- | Xentella cream (7 % <i>Centella asiatica</i> extracts)     | ↓ wound area, inflammation: corresponding EA (0.65%) partially responsible<br>↑ hydroxyproline: EA not responsible                                                                                                                                                    |       |
|                                                                                                                                                                                                                            | <i>In vivo</i> | Wistar rats, burn wound                                    | 0.65% ellagic acid                     | Silver sulphadiazine 1%                                    | ↓ wound area; ↓ MPO. EA 0,65% partially responsible                                                                                                                                                                                                                   |       |
| Ethanol:water (70:30) extract from flowers                                                                                                                                                                                 | <i>In vivo</i> | Wistar rats, burn wound                                    | 5-10% cream                            | Silver sulphadiazine 1%                                    | ↓ wound area vs positive control<br>↑ thickness, collagen orientation                                                                                                                                                                                                 | [56]  |
| Fruit peel powder                                                                                                                                                                                                          | <i>In vivo</i> | Wistar rats, burn wound                                    | 100 mg/Kg of powder                    | Mupirocin 100 mg/Kg ointment                               | ↓ wound area ↑ hydroxyproline vs positive control                                                                                                                                                                                                                     | [113] |
| Ethyl acetate extract from flowers                                                                                                                                                                                         | <i>In vivo</i> | Diabetic Wistar rats, round excision                       | 0.2% ointment                          | Nitrofurazone (200 mg/Kg)                                  | ↓ wound area vs positive control; ↓ inflammatory infiltration<br>↑ in collagen                                                                                                                                                                                        | [57]  |
| Ethanol extract from peel                                                                                                                                                                                                  | <i>In vivo</i> | Diabetic Wistar rats, linear incision                      | Hydrogel 30% peel polyphenols (GA eq.) | //                                                         | ↓ wound area; ↑ fibroblasts, collagen, vascularization<br>↑ hydroxyproline, NO, TGF-β1, VEGF, EGF                                                                                                                                                                     | [114] |
| Extract from whole fruit (solvent omitted) titred for ellagic acid (40%)                                                                                                                                                   | <i>In vivo</i> | Wistar rats, linear incision                               | 2.5-7.5% ointment                      | Betadine ointment                                          | ↑ collagen, neutrophil infiltration, angiogenesis, fibrosis                                                                                                                                                                                                           | [53]  |
| Ethanol:water (4:1) extract from peel powder titred for punicalagin and punicalin (22 mg/g as sum)                                                                                                                         | Human          | A woman (76 years), chronic wound single case-study        | 2% hydrogel, topically                 | //                                                         | Complete healing after 12 weeks. Subject was not responsive to clostebol, neomycin, gentamicin, angiology care, silver sulphadiazine, betamethasone dipropionate                                                                                                      | [59]  |
| <b><i>Ribes nigrum</i> L.</b>                                                                                                                                                                                              |                |                                                            |                                        |                                                            |                                                                                                                                                                                                                                                                       |       |
| Essential oil from buds, steam extraction                                                                                                                                                                                  | <i>In vivo</i> | Wistar rats, Burn wound                                    | 5% essential oil gel                   | Cicatrizin cream                                           | ↓ wound area                                                                                                                                                                                                                                                          | [61]  |
| Methanol extract from leaves of <i>Ribes</i> spp.: <i>R. alpinum</i> , <i>R. anatolica</i> , <i>R. multiflorum</i> , <i>R. nigrum</i> , <i>R. orientale</i> , <i>R. petraeum</i> , <i>R. rubrum</i> , <i>R. uva-crispa</i> | <i>In vivo</i> | Swiss albino mice and Sprague-Dawley rats, linear excision | 1% cream                               | Phyto Krem (containing 1% <i>Triticum vulgare</i> extract) | ↓ wound area for <i>R. multiflorum</i> and <i>R. nigrum</i> : only <i>R. nigrum</i> comparable to positive control. Ethyl acetate fraction from <i>R. nigrum</i> more active then DCM and ButOH. The effect of EtAc fraction correlated with ABTS scavenging activity | [62]  |

| Rubus idaeus L.                                                                                                      |                                              |                                                                       |                                                    |                                        |                                                                                                                                           |
|----------------------------------------------------------------------------------------------------------------------|----------------------------------------------|-----------------------------------------------------------------------|----------------------------------------------------|----------------------------------------|-------------------------------------------------------------------------------------------------------------------------------------------|
| Liposoluble fraction of <i>in vitro</i> cultured cells from leaves (titred in linoleic and alpha-linolenic acid)     | In vitro                                     | Keratinocytes (HaCaT)                                                 | 0.1% liposoluble fraction in medium                | TO-901317 10 μM (LXR agonist)          | ↑ beta-glucocerebrosidase (comparable with positive control)                                                                              |
|                                                                                                                      |                                              |                                                                       |                                                    | Retinoic acid 1 μM                     | ↑ expression of aquaporin-3, filaggrin, involucrin, hyaluronan synthase-3                                                                 |
|                                                                                                                      |                                              | HDF                                                                   |                                                    | Retinoic acid 1 μM or Ascorbate 300 μM | ↑ expression of hyaluronan synthase-2, elastin, fibrillin I, lysil-oxidase;<br>↑ release of pro-collagen I, pro-collagen III, fibronectin |
|                                                                                                                      | Human (n=20 women with dry or very dry skin) | Double blinded facial application, twice a day/28 days                | 0.1% liposoluble fraction                          | Moisturizing base cream                | ↑ hydration (+20%) vs moisturizing base cream                                                                                             |
|                                                                                                                      | [70]                                         |                                                                       |                                                    |                                        |                                                                                                                                           |
| Rubus imperialis Cham. & Schltdl.                                                                                    |                                              |                                                                       |                                                    |                                        |                                                                                                                                           |
| Methanol extract from aereal part (leaves and branches) and respective n-hexane, chloroform, ethyl acetate fractions | In vitro                                     | L929, horizontal scratch                                              | 1-100 μg/mL extract or 1-100 μM niga-ichigoside F1 | //                                     | ↑ fibroblast migration by extract but not niga-ichigoside                                                                                 |
|                                                                                                                      |                                              | DPPH test                                                             | 1-100 μg/mL                                        | Ascorbic acid 50 μg/mL                 | Scavenging of DPPH (-75%) at 10 μg/mL                                                                                                     |
|                                                                                                                      | Ex vivo                                      | Neutrophils from BALB/c mice after i. p. injection of oyster glycogen | 1-100 μg/mL extract or 1-100 μM niga-ichigoside F1 | //                                     | Extract or niga-ichigoside: ↓ nitric oxide release (10 μg/mL and 10 μM); ↑ phagocytosis (10 μg/mL)                                        |
|                                                                                                                      |                                              |                                                                       |                                                    |                                        |                                                                                                                                           |
|                                                                                                                      | In vivo                                      | Swiss mice, air pouch oedema                                          | 100 mg/kg                                          | Indomethacin 30 mg/kg (pre-treatment)  | ↓ neutrophil infiltration, total leukocyte count                                                                                          |
|                                                                                                                      |                                              | BALB/c mice, wound excision                                           | 1-2.5% in semisolid base                           | //                                     | ↓ wound area                                                                                                                              |
| [66]                                                                                                                 |                                              |                                                                       |                                                    |                                        |                                                                                                                                           |
| Sambucus nigra L.                                                                                                    |                                              |                                                                       |                                                    |                                        |                                                                                                                                           |
| Leaves tincture, 1:5 D/E (Romanian Pharmacopoeia X), 70% ethanol                                                     | In vivo                                      | Wistar rats, burn wound                                               | 10% ointment                                       | Silver sulphadiazine 1%                | ↓ wound area vs positive control                                                                                                          |
| [72]                                                                                                                 |                                              |                                                                       |                                                    |                                        |                                                                                                                                           |

[70]

[66]

[72]

| Sambucus ebulus L.                                                                                                                         |          |                                      |                                                                             |                                  |                                                                                                                                                                                                                                                                                                                                |      |
|--------------------------------------------------------------------------------------------------------------------------------------------|----------|--------------------------------------|-----------------------------------------------------------------------------|----------------------------------|--------------------------------------------------------------------------------------------------------------------------------------------------------------------------------------------------------------------------------------------------------------------------------------------------------------------------------|------|
| Methanol extract from fruit after percolation with hexane and ethyl acetate                                                                | In vivo  | Wistar rats, wound excision          | 5% ointment                                                                 | //                               | ↓ wound area                                                                                                                                                                                                                                                                                                                   | [73] |
| Methanol:water (70:30) extract from leaves                                                                                                 | In vivo  | Wistar rats, wound excision          | 2-5% ointment                                                               | Phenytoin                        | ↑ fibroblast count, neovascularization (2% ointment superior than positive control and 5% ointment)                                                                                                                                                                                                                            | [74] |
| n-hexane, diethyl ether, ethyl acetate, methanol subsequent extraction from leaves followed by bioguided fractionation of methanol extract | In vivo  | Sprague-Dawley rats, linear incision | 1% ointment                                                                 | Madecassol (C. asiatica extract) | Methanol and ethyl acetate extract: ↑ tensile strength                                                                                                                                                                                                                                                                         | [75] |
|                                                                                                                                            |          | Swiss albino mice, round excision    |                                                                             |                                  | Methanol extract: ↓ wound area (comparable with positive control); Ethyl acetate extract was less active                                                                                                                                                                                                                       |      |
|                                                                                                                                            |          | Chemical analysis                    |                                                                             |                                  | Quercetin-3-O-glu was the major compound in the most active fraction from methanol extract. The activity of the fraction was lower than the extract                                                                                                                                                                            |      |
| Vaccinium macrocarpon Ait.                                                                                                                 |          |                                      |                                                                             |                                  |                                                                                                                                                                                                                                                                                                                                |      |
| Oil from seeds obtained by cold-pressing                                                                                                   | In vivo  | Sprague-Dawley rats, wound excision  | 100 mg/Kg ointment                                                          | Mupirocin 100 mg/Kg ointment     | ↓ wound area earlier vs positive control<br>↑ hydroxyproline                                                                                                                                                                                                                                                                   | [91] |
|                                                                                                                                            |          | Chemical analysis                    |                                                                             |                                  | 3.167±0.124 mg/g GA eq. phenolic derivatives; 68% w/w of total PUFA; 31% w/w of omega-3 PUFA                                                                                                                                                                                                                                   |      |
| Vaccinium uliginosum L.                                                                                                                    |          |                                      |                                                                             |                                  |                                                                                                                                                                                                                                                                                                                                |      |
| Polyphenol-enriched fractions from methanol:acidic water fruit extract (70:30, 0,5% acetic acid)                                           | In vitro | Primary fibroblasts (HDFa)           | 50 µg/mL of extract or related anthocyanins and proanthocyanidins fractions | FBS 10% medium                   | ↑ migration. Anthocyanin-enriched fraction but not PAC-enriched fraction was responsible                                                                                                                                                                                                                                       | [92] |
|                                                                                                                                            |          |                                      | 10 µM of Procyanidin B2 or its structural subunits (HPCA, epicatechin)      |                                  | ↑ glycolysis by procyanidin B2, but not structural subunits; Structural subunits: ↑ oxygen consumption, ATP, ↓ proton leakage; In multigenic analysis: procyanidin B2 and subunits upregulated COL1A2 (pro-alpha2 chain of type I collagen), ITGB1 (integrin receptor subunit beta 1), and RHOA (ras homolog family member A); |      |

|                                                                                                  |          |                               |                                                                                                                                                 |                                      |                                                                                                                                                                                                                                                                                           |
|--------------------------------------------------------------------------------------------------|----------|-------------------------------|-------------------------------------------------------------------------------------------------------------------------------------------------|--------------------------------------|-------------------------------------------------------------------------------------------------------------------------------------------------------------------------------------------------------------------------------------------------------------------------------------------|
|                                                                                                  |          |                               |                                                                                                                                                 |                                      | Hypothesis: procyanidins modulate a complex interplay between ECM proteins (COL1A2 and ITGB1) and RHO guanosine triphosphate phosphatase (GTPase);<br>Down-regulated genes were MMP2 and CCL2                                                                                             |
| Polyphenol-enriched fractions from methanol:acidic water fruit extract (70:30, 0,5% acetic acid) | In vitro | RAW 264.7 (mouse macrophages) | 50 µg/mL of extract or related anthocyanins and proanthocyanidins fractions                                                                     | Dexamethasone 10 µM                  | ↓ ROS by fractions, but not extract;<br>↓ iNOS, NO, slightly COX-2 by extract and fractions;<br>Fractions were more active on COX-2                                                                                                                                                       |
|                                                                                                  |          | Chemical analysis             | Total phenolics in phenol-enriched extracts (601±18 mg/g). The analysis showed also details on anthocyanins and proanthocyanidins (PAC) content |                                      |                                                                                                                                                                                                                                                                                           |
|                                                                                                  |          | Primary fibroblasts (HDFa)    | 50 µg/mL of extract or related anthocyanins and proanthocyanidins fractions                                                                     | FBS 10% medium                       | ↑ migration. The anthocyanidin-enriched fraction and PAC-enriched were responsible for induced migration.                                                                                                                                                                                 |
|                                                                                                  |          |                               | 10 µM of Procyanidine B2 or its structural subunits (HPCA, epicatechin)                                                                         | [see <i>Vaccinium uliginosum</i> L.] |                                                                                                                                                                                                                                                                                           |
|                                                                                                  |          | RAW 264.7 (mouse macrophages) | 50 µg/mL of extract or related anthocyanins and proanthocyanidins fractions                                                                     | Dexamethasone 10 µM                  | ↓ ROS by fractions, but not extract, inhibited intracellular ROS; ↓ iNOS, NO, slightly COX-2 by extract and fractions                                                                                                                                                                     |
|                                                                                                  |          | Chemical analysis             | Total phenolics in phenol-enriched extracts (601±18 mg/g). The analysis showed also details on anthocyanins and proanthocyanidins (PAC) content |                                      |                                                                                                                                                                                                                                                                                           |
| <i>Vaccinium vitis-idaea</i> L.                                                                  |          |                               |                                                                                                                                                 |                                      |                                                                                                                                                                                                                                                                                           |
| Polyphenol-enriched fractions from methanol:acidic water fruit extract (70:30, 0,5% acetic acid) | In vitro | RAW 264.7 (mouse macrophages) | 50 µg/mL of extract or related anthocyanins and proanthocyanidins fractions                                                                     | Dexamethasone 10 µM                  | ↓ ROS by fractions, but not extract, inhibited intracellular ROS; ↓ iNOS, NO, slightly COX-2 by extract and fractions                                                                                                                                                                     |
|                                                                                                  |          | Chemical analysis             | Total phenolics in phenol-enriched extracts (601±18 mg/g). The analysis showed also details on anthocyanins and proanthocyanidins (PAC) content |                                      |                                                                                                                                                                                                                                                                                           |
|                                                                                                  |          | Primary fibroblasts (HDFa)    | 50 µg/mL of extract or related anthocyanins and proanthocyanidins fractions                                                                     | FBS 10% medium                       | ↑ migration. The anthocyanidin-enriched fraction and PAC-enriched were responsible for induced migration.                                                                                                                                                                                 |
|                                                                                                  |          |                               | 10 µM of Procyanidine B2 or its structural subunits (HPCA, epicatechin)                                                                         | [see <i>Vaccinium uliginosum</i> L.] |                                                                                                                                                                                                                                                                                           |
|                                                                                                  |          | RAW 264.7 (mouse macrophages) | 50 µg/mL of extract or related anthocyanins and proanthocyanidins fractions                                                                     | Dexamethasone 10 µM                  | ↓ ROS by fractions, but not extract, inhibited intracellular ROS; ↓ iNOS, NO, slightly COX-2 by extract and fractions                                                                                                                                                                     |
|                                                                                                  |          | Chemical analysis             | Total phenolics in phenol-enriched extracts (601±18 mg/g). The analysis showed also details on anthocyanins and proanthocyanidins (PAC) content |                                      |                                                                                                                                                                                                                                                                                           |
| <i>Vitis vinifera</i> L.                                                                         |          |                               |                                                                                                                                                 |                                      |                                                                                                                                                                                                                                                                                           |
| Proanthocyanidin-enriched fraction isolated from grape seed extract (ethanol:water 80:20)        | In vitro | Human fibroblasts (TIG 3-20)  | 10-30 µg/mL                                                                                                                                     | //                                   | ↓ ROS; ↓ uPA (urokinase plasminogen activator) and PAI-1 (Plasminogen activator inhibitor-1) antagonist for plasminogen conversion to plasmin;<br>↓ fibrinolytic activity, fibroblast migration<br>Hypothesis: anti-oxidant effect as mechanism for migration and fibrinolysis inhibition |

[92]

[103]

|                                                                                                                                                                        |                 |                                                          |                                    |                              |                                                                                                                         |       |
|------------------------------------------------------------------------------------------------------------------------------------------------------------------------|-----------------|----------------------------------------------------------|------------------------------------|------------------------------|-------------------------------------------------------------------------------------------------------------------------|-------|
| Commercial grape seed proanthocyanidin extract; containing approximately 54% dimeric, 13% trimeric, 7% tetrameric proanthocyanidins, and 5000 ppm of trans-resveratrol | <i>In vitro</i> | Human keratinocytes (HaCaT), stimulation with H2O2       | 2.5-15 µg/mL                       | //                           | ↑ VEGF vs H <sub>2</sub> O <sub>2</sub> or TNF-α (at 15 µg/mL)                                                          | [96]  |
| Commercial grape seed proanthocyanidin extract; containing approximately 54% dimeric, 13% trimeric, 7% tetrameric proanthocyanidins, and 5000 ppm of trans-resveratrol | <i>In vitro</i> | Human keratinocytes (HaCaT)                              | 10 µg/mL                           | //                           | ↑ VEGF promoter activity in absence or presence of H <sub>2</sub> O <sub>2</sub>                                        | [97]  |
|                                                                                                                                                                        | <i>In vivo</i>  | BalbC mice, wound excision                               | 25 µL of 100 mg/mL extract         | //                           | ↓ wound area; ↑ keratin deposition, connective tissue, VEGF and oxidative markers (4-HNE; oxidized/reduced glutathione) |       |
| Oil from seeds obtained by cold-pressing                                                                                                                               | <i>In vivo</i>  | Sprague-Dawley rats, wound excision                      | 100 mg/Kg                          | Mupirocin 100 mg/Kg ointment | ↓ wound area vs positive control; ↑ hydroxyproline                                                                      | [91]  |
|                                                                                                                                                                        |                 | Chemical analysis                                        |                                    |                              | Phenolic derivatives: 3,330± 0.123 mg/g GA eq.; total PUFA: 68%; omega-3 PUFA: 0,4%                                     |       |
| Grape seed extract (80:20 ethanol:water)                                                                                                                               | <i>In vivo</i>  | Rabbits, wound excision, treatment 2 per day/21 days     | GSE 2-5-10-70% w/w<br>Eucerin base | Phenytoin cream 1%           | ↓ wound area vs positive control by GSE 2%<br>↑ hydroxyproline at all doses                                             | [104] |
| Grape skin dry powder (Cabernet Sauvignon variety)                                                                                                                     | <i>In vivo</i>  | Sprague-Dawley rats, wound excision, once a day /13 days | 100 mg/Kg ointment (vaseline base) | Mupirocin 100 mg/Kg ointment | ↓ wound area, comparable with positive control<br>↑ hydroxyproline vs positive control                                  | [107] |
| Grape seed extract (extraction and composition information omitted)                                                                                                    | Human           | 40 patients after small surgery                          | 2% cream                           | //                           | ↓ wound area vs placebo                                                                                                 | [105] |
| Grape seed extract (70:30 ethanol:water)                                                                                                                               | Human           | 129 women with caesarean section                         | 5% ointment                        | //                           | Improvement of healing score (REEDA) vs placebo                                                                         | [106] |
